# Supplementary material for: Targeting CCL5 signaling attenuates neuroinflammation after seizure
Source: PubMed Central journal article supplement (PMC9804050; doi:10.1111/cns.14006), 2022-11-28

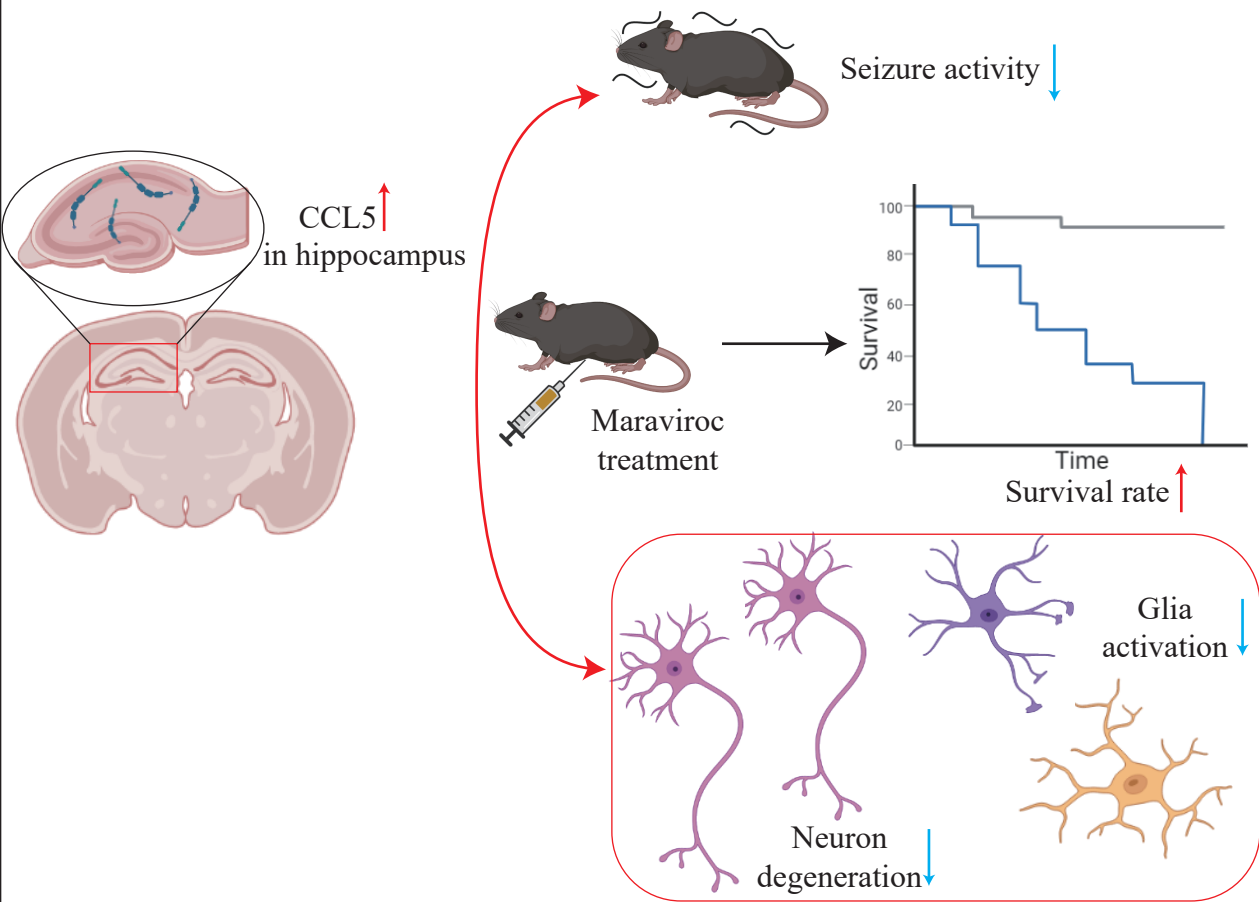

Supplement: CNS-29-317-s004.pdf [file CNS-29-317-s004.pdf]
